# Supplementary material for: Identification of Circulating Diagnostic Biomarkers for Coronary Microvascular Disease in Postmenopausal Women Using Machine-Learning Techniques
Source: MDPI journal article supplement (doi:10.3390/metabo11060339), 2021-05-25
Supplement: s1 [file s1]

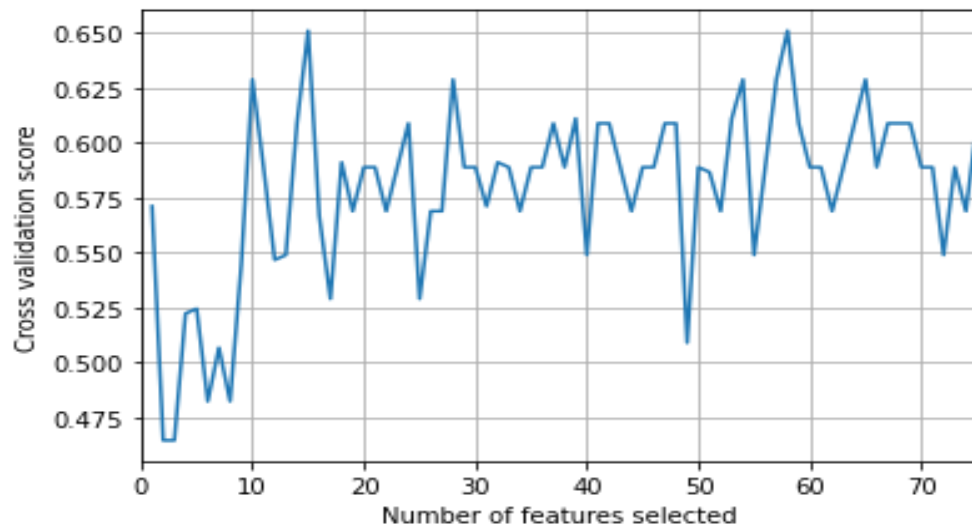

**Figure S1.** RFEVC algorithm results. RFEVC iteratively computed the cross-validation score each time it eliminated a metabolite feature column

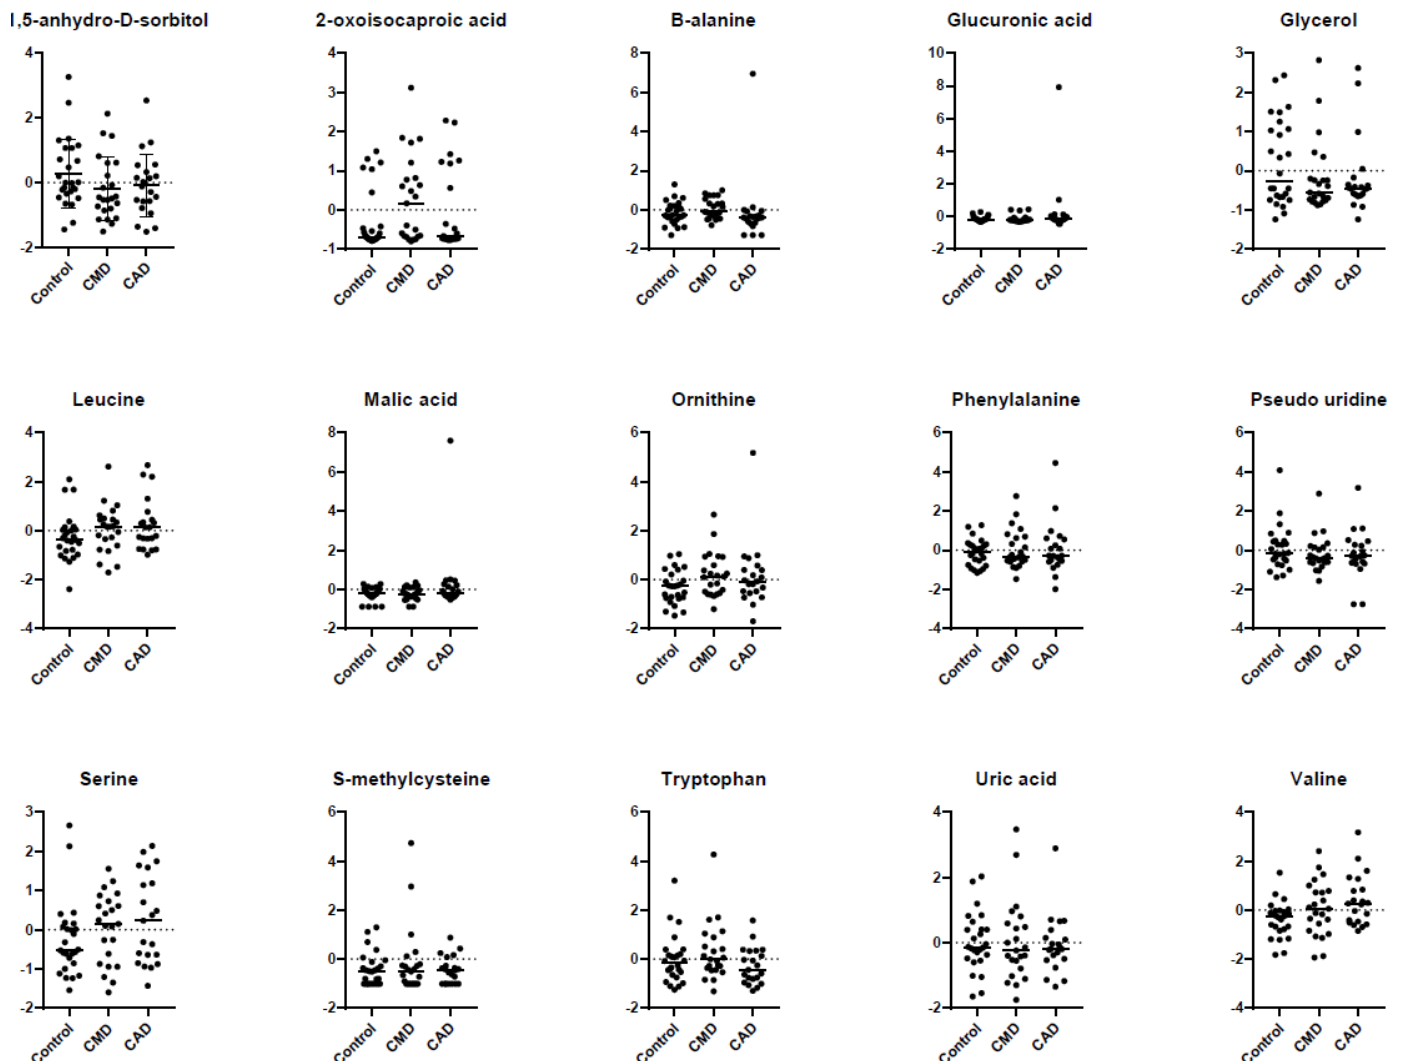

**Figure S2.** Relative abundance of 15 metabolites in Control, CMD and CAD groups that gave the highest ROC in when random forest algorithm was used.
